# Supplementary material
Source: PubMed Central journal article supplement (PMC2575269)
Supplement: 0804350105_0804350105SI.pdf [file 0804350105_0804350105SI.pdf]

# Supporting Information

Watase et al. 10.1073/pnas.0804350105

## SI Text

### Materials and Methods

**Purkinje cell (PC) preparation.** Each mouse was anesthetized with isoflurane and decapitated, and the cerebellum was dissected on ice. After removal of the meninges, the cerebella were washed twice in ice-cold high-sucrose solution (containing 30 mM Na<sub>2</sub>SO<sub>4</sub>, 2 mM K<sub>2</sub>SO<sub>4</sub>, 10 mM Hepes, 5 mM MgCl<sub>2</sub>, 0.2 mM CaCl<sub>2</sub>, 10 mM glucose, 180 mM sucrose, and 0.04 mM phenol red, pH 7.4 with NaOH). Each cerebellum was then minced into 10 pieces of similar size in ice-cold high-sucrose solution and transferred to a 15-ml conical tube. The pieces were allowed to settle, and the supernatant was removed. The pieces were then incubated at room temperature for 13 min in filtered papain solution [6 ml of high-sucrose solution plus 286  $\mu$ l of papain slurry (Worthington), pH 7.4 with NaOH]. After papain digestion, the pieces were washed three times with 10 ml of ice-cold high-K<sup>+</sup> solution (82 mM Na<sub>2</sub>SO<sub>4</sub>, 30 mM K<sub>2</sub>SO<sub>4</sub>, 10 mM Hepes, 5 mM MgCl<sub>2</sub>, 10 mM glucose, 1 mM EGTA and 0.04 mM phenol red, pH 7.4 with NaOH), suspended in 2 ml of high-K<sup>+</sup> solution and triturated 10 times with a fire-polished Pasteur pipette, followed by 10 times with a Pasteur pipette fire-polished to 1/2 tip diameter. The cells were plated on coverslips precoated with poly-D-lysine and laminin (BD Biosciences) in a 24-well plate (35  $\mu$ l per well) containing Neurobasal complete medium (sodium pyruvate, L-glutamine, B27 and *N*-acetylcysteine). The plate was kept on ice until recording or immunostaining.

**Electrophysiology.** Purkinje neurons were selected based on morphology; large, pear-shaped cells lacking large processes were chosen for recording. Whole-cell currents were recorded at room temperature (20–22°C) by using an Axopatch 200B patch-clamp amplifier (Axon Instruments). Borosilicate glass capillaries were pulled in a model P-87 puller (Sutter Instruments) and heat-polished before use with a model MF-9 microforge (Narishige). Pipette resistance was  $\approx$ 2–3 M $\Omega$  when filled with an internal solution consisting of 122 mM Cs-Asp, 10 mM Hepes, 10 mM EGTA, 5 mM MgCl<sub>2</sub>, 4 mM ATP, 0.4 mM GTP, pH 7.5. The bath solution contained 167 mM TEA-Cl, 2 mM BaCl<sub>2</sub>, 10 mM D-glucose, 10 mM Hepes, 0.0005 mM tetrodotoxin, pH 7.3. Series resistance was compensated electronically by  $\geq$ 90%, and membrane capacitance (18.5  $\pm$  0.5 pF) was corrected online; residual linear capacitive and leak currents were subtracted by the  $-P/4$  method. Cells were voltage-clamped at  $-80$  mV, and

pulse depolarizations were applied at 10-s intervals. Data were passed through a 4-pole low-pass Bessel filter at 1–2 kHz, digitized at 5–10 kHz using a Digidata 1320A (Axon Instruments), and stored on a personal computer for offline analysis. Patch-clamp data were acquired and analyzed using Clampex 8.2 and Clampfit 8.2, respectively (Molecular Devices).

The Boltzmann fits of the activation and inactivation data were calculated using the equation

$$I/I_{\max} = \frac{I_2 - I_1}{1 + e^{(V-V_{0.5})/k}} + I_1 \quad [\text{S1}]$$

where  $I/I_{\max}$  is normalized current amplitude,  $V$  is membrane potential in mV,  $V_{0.5}$  is the voltage at half-maximal  $I/I_{\max}$ ,  $k$  is the slope factor of activation in mV/ $e$ -fold change in  $I/I_{\max}$ , and  $I_1$  and  $I_2$  are the minimum and maximum values of  $I/I_{\max}$ , respectively.

**Immunocytochemistry.** Acutely dissociated cerebellar neurons were fixed in 4% paraformaldehyde at room temperature and permeabilized with 0.5% Triton X-100 for 15 min. The cells were incubated for 1 h at room temperature with the monoclonal Tuj1 antibody (1:1,000; Covance) together with the polyclonal anti-Ca<sub>v</sub>2.1 2L1 antibody (1:200; Alomone) followed by goat anti-mouse Alexa Fluor 488 and goat anti-rabbit Alexa Fluor 546. Images were scanned using a Leica confocal microscope. To measure Ca<sub>v</sub>2.1 immunoreactivity, the 488-nm channel ( $\beta$ -tubulin) was used to draw a region of interest around the cell body; that region of interest was then applied to the 546-nm channel. Fluorescence intensity was quantified using ImageJ 1.32j, downloaded from <http://rsb.info.nih.gov/>.

**Immunofluorescence.** For immunofluorescence, we used goat calbindin antibody (1  $\mu$ g/ml), guinea pig vesicular transporter 2 (VGluT2) antibody (0.5 mg/ml), rabbit vesicular glutamate transporter 1 (VGluT1) antibody (1  $\mu$ g/ml), and rabbit vesicular GABA transporter (VGAT) antibody (1  $\mu$ g/ml), the specificities of which have been reported previously (1, 2). Paraformaldehyde-fixed, cerebellar sections (50  $\mu$ m in thickness) were incubated with 10% normal donkey serum for 20 min, primary antibodies overnight, and Alexa 488-, Cy3- and Cy5-labeled species-specific secondary antibodies for 2 h at a dilution of 1:200 (Invitrogen; Jackson ImmunoResearch). Images were taken with a confocal laser scanning microscope (FV1000; Olympus Optical).

1. Miyazaki T, Fukaya M, Shimizu H, Watanabe M (2003) Subtype switching of vesicular glutamate transporters at parallel fibre-Purkinje cell synapses in developing mouse cerebellum. *Eur J Neurosci* 17:2563–2572.

2. Miura E, et al. (2006) Expression and distribution of JNK/SAPK-associated scaffold protein JSAP1 in developing and adult mouse brain. *J Neurochem* 97:1431–1446.



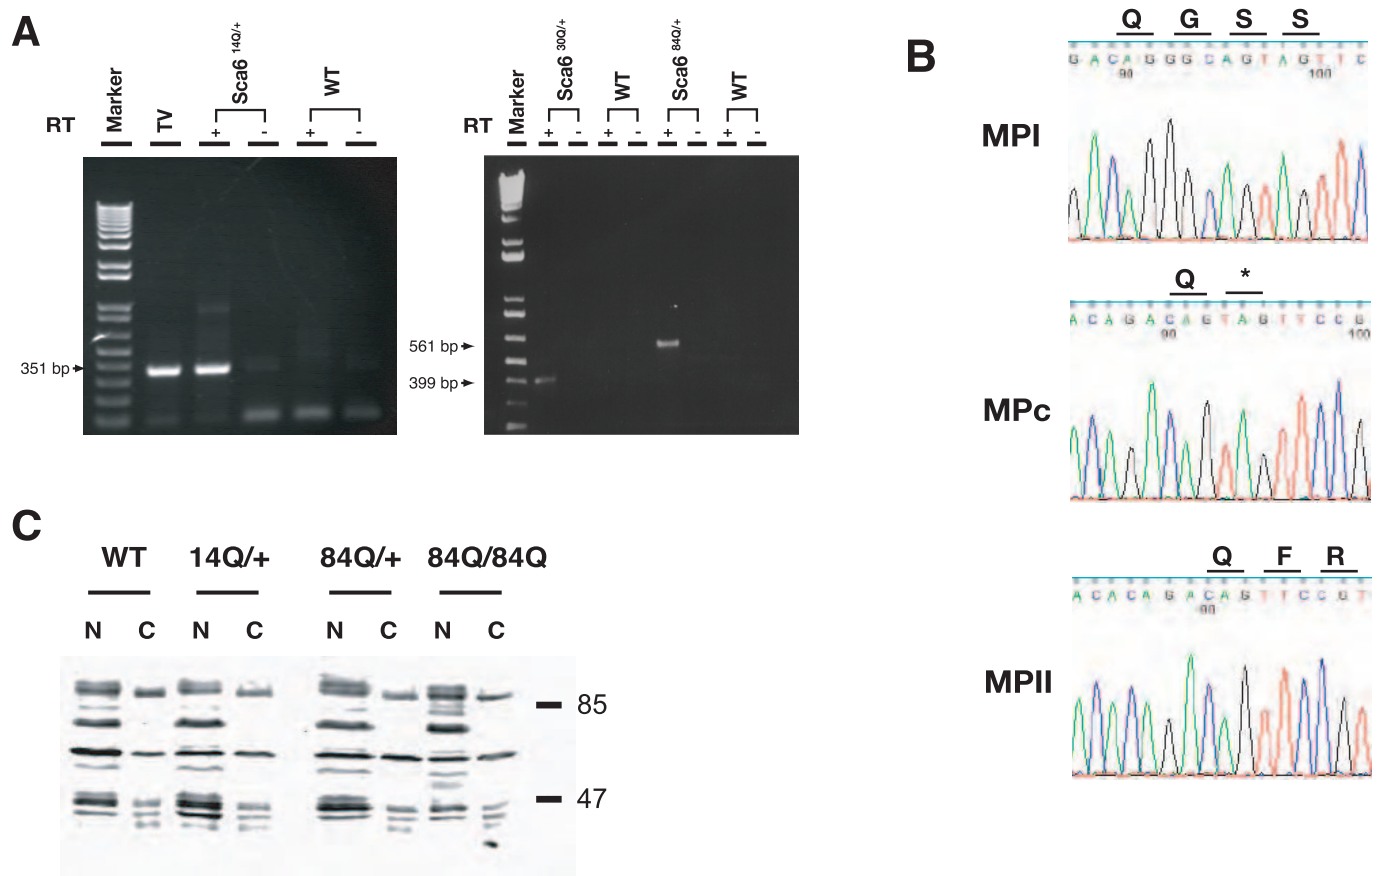

**Fig. 52.** Expression analysis of mutant  $\text{Ca}_v2.1$  channel. (A) RT-PCR analysis on cerebellar RNA from 8-week-old heterozygous *Sca6* knockin (KI) animals (*Sca6*<sup>14Q/+</sup>, *Sca6*<sup>30Q/+</sup>, and *Sca6*<sup>84Q/+</sup>) and their wild-type littermates (WT). The primers were designed to amplify the part of human but not mouse exon 47 that includes the tract of CAG repeats. (Left) Targeting vector for *Sca6*<sup>14Q/+</sup> (TV) was used as a positive control. (B) Alternative splicing at the boundary of  $\text{Ca}_v2.1$  exon 46/47. cDNAs obtained from the *Sca6*<sup>84Q/84Q</sup> PCs were amplified and subcloned for sequencing. Electropherogram indicates the presence of the three types of alternatively spliced isoforms in the *Sca6*<sup>84Q/84Q</sup> PCs. (C) Failure to detect polyglutamine-containing C-terminal cleavage fragment in the mutant cerebella. Nuclear and cytoplasmic fractions of cerebellar lysates from 6-month-old *Sca6*<sup>14Q/+</sup>, *Sca6*<sup>84Q/+</sup>, and *Sca6*<sup>84Q/84Q</sup> KI mice and a 6-month-old WT mouse were blotted against CT-2.

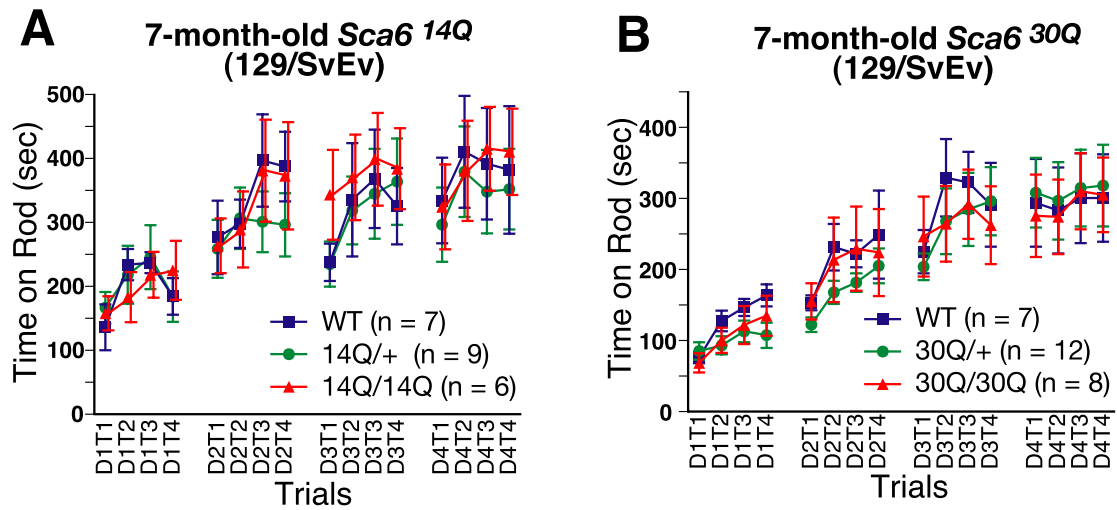

**Fig. S3.** Rotarod performance of 7-month-old *Sca6*<sup>14Q/14Q</sup> (A) and *Sca6*<sup>30Q/30Q</sup> mice (B) of 129/SvEv background. Mice were trained in four trials per day (T1–T4) for four days (D1–D4). Error bars indicate SEM.



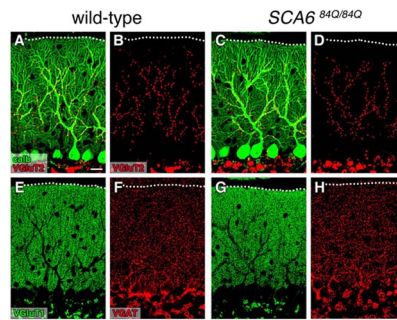

**Fig. S5.** Neuropathological analysis of 20-month-old *Sca6<sup>84Q/84Q</sup>* mouse cerebella. (A–D) Immunofluorescence microscopy for calbindin (green) and VGLUT2 (red). Dendritic arborization of Purkinje neurons and the distribution of VGLUT2-positive terminals were similar between the mutants and their wild-type littermates. (E–H) Immunofluorescence microscopy for VGLUT1 (E and G) and VGAT (F and H) failed to show any significant changes in the distributions of VGLUT1-positive terminals or of inhibitory terminals, respectively, in the mutant cerebella.
